# Supplementary material for: Management of iatrogenic perforation during colonoscopy in ulcerative colitis patients: a survey of gastroenterologists and colorectal surgeons
Source: Springer Nature journal article supplement (doi:10.1007/s00384-018-3112-9), 2018-07-05
Supplement: MOESM1 [file 15911010]

| **Pairwise Comparison of Response Profiles Across Groups** | | | |
| --- | --- | --- | --- |
| Case Number | Surgeons vs. general GIs  p-value | General GIs vs. IBD GIs  p-value | Surgeons vs. IBD GIs  p-value |
| 1a | <0.0001* (B, C) | 0.34 | 0.01* (B) |
| 1b | 0.0003* (B, C) | 0.58 | 0.01* (B) |
| 1c | <0.0001* (B, C) | 0.35 | 0.002* (B) |
| 2a | 0.0004* (F) | 0.33 | 0.01* (B) |
| 2b | 0.002* (F) | 0.21 | 0.003* (B) |
| 2c | <0.0001* (F) | 0.10 | 0.003* (B) |
| 3a | 0.007* (F) | 0.02 | 0.0009* (B) |
| 3b | 0.02 | 0.03 | 0.01* (G) |
| 3c | 0.0004* (F) | 0.07 | 0.02 |
| 4a | 0.004* (F) | 0.10 | 0.05 |
| 4b | 0.0001* (F) | 0.07 | 0.006* (G) |
| 4c | <0.0001* (F) | 0.07 | 0.003* (G) |
| 5a | 0.0001* (B, F) | 0.05 | 0.0001* (B) |
| 5b | <0.0001* (B, F) | 0.03 | 0.0002* (B, G) |
| 5c | <0.0001* (B, F) | 0.04 | <0.0001* (B, G) |
| * Significant at the adjusted 0.017 significance level. A = Missing; B = Primary endoscopic repair; C = Primary surgical repair; D = Segmental colectomy with colostomy; E = Segmental colectomy with primary anastomosis; F = Sub-total colectomy with end ileostomy; G = Staged total proctocolectomy with ileal pouch. Letters not seen in above table represent answer choices for which there was no significant difference when comparing given cases. | | | |
